# Supplementary material for: Lysine-induced swine satellite cell migration is mediated by the FAK pathway
Source: Royal Society of Chemistry journal article supplement (doi:10.1039/c8fo02066c), 2019-01-01
Supplement: c8fo02066c1.pdf [file c8fo02066c1.pdf]

## Supplemental Tables

Table S1. Antibodies used in study

| <b>Antibody</b>       | <b>Type</b> | <b>Source</b> | <b>Product Number</b> | <b>phosphorylation site</b> |
|-----------------------|-------------|---------------|-----------------------|-----------------------------|
| Pax-7                 | mouse       | R&D           | MAB1675               | -                           |
| anti-FAK              | rabbit      | CST           | #3285                 | -                           |
| anti-phospho-FAK      | rabbit      | CST           | #3283                 | Tyr397                      |
| anti-phospho-FAK      | rabbit      | ZENBIO        | 381143                | Tyr397                      |
| anti-paxillin         | rabbit      | CST           | #2542                 | -                           |
| anti-phospho-paxillin | rabbit      | CST           | #2541                 | Tyr118                      |
| anti-Akt              | rabbit      | CST           | #9272                 | -                           |
| anti-phospho-Akt      | rabbit      | CST           | #9271                 | Ser473                      |
| anti- $\beta$ -actin  | rabbit      | CST           | #4970                 | -                           |
| anti-rabbit IgG       | -           | Earth         | #E030120              | -                           |
| anti-mouse IgG        | -           | Earth         | #E030110              | -                           |
